# Supplementary material
Source: PubMed Central journal article supplement (PMC5339066)
Supplement: NIHMS803191-supplement-supp_table.pdf [file NIHMS803191-supplement-supp_table.pdf]

**Table S1**

| <b>Target Regions</b>                        | <b>Intensity</b> | <b>Abbreviations</b> |
|----------------------------------------------|------------------|----------------------|
| <b>Cortex</b>                                |                  |                      |
| Cingulate Cortex, area 1                     | ++++             | Cg1                  |
| Cingulate Cortex, area 2                     | ++               | Cg2                  |
| Agranular insular cortex                     | +                | AI                   |
| Agranular insular cortex, ventral part       | +                | AIV                  |
| Dorsal peduncular Cortex                     | +                | DP                   |
| Infralimbic cortex                           | +                | IL                   |
| Medial orbital cortex                        | +                | MO                   |
| Prelimbic cortex                             | +                | PrL                  |
| Indesium griseum                             | +++              | IG                   |
| <b>Olfactory bulb</b>                        |                  |                      |
| Ventral tenia tecta                          | +                | VTT                  |
| Dorsal tenia tecta                           | +                | DTT                  |
| <b>Hippocampus</b>                           |                  |                      |
| Molecular dentate gyrus                      | +                | MoDG                 |
| Pyramidal cell hippocampus                   | +                | Py                   |
| <b>Amygdala</b>                              |                  |                      |
| Anterior amygdala                            | +++              | AA                   |
| Medial amygdala                              | +++              | MeA                  |
| Basolateral amygdala nucleus, posterior      | +                | BLP                  |
| Basomedial amygdala nucleus, anterior        | +                | BMA                  |
| Central amygdala nucleus                     | +                | CeA                  |
| Medial amygdala nucleus, posterior dor       | ++               | MePD                 |
| Medial amygdala nucleus, posterior ven       | ++               | MePV                 |
| <b>Septum</b>                                |                  |                      |
| Lateral septal nucleus, ventral              | +++              | LSV                  |
| Lateral septal nucleus, dorsal               | +                | LSD                  |
| Septohypothalamic nucleus                    | +++              | SHy                  |
| <b>Diagonal band of Broca</b>                |                  |                      |
| Nucleus of the vertical limb of the diagn    | +                | VDB                  |
| <b>Bed nucleus of stri terminalis (Bnst)</b> |                  |                      |
| Bnst, medial division, anterior              | ++++             | STMA                 |
| Bnst, medial division, anterior lateral      | ++++             | STMAL                |
| Bnst, lateral division, ventral              | ++++             | STLV                 |

|                                |      |      |
|--------------------------------|------|------|
| Bnst, medial division, ventral | ++++ | SLMV |
|--------------------------------|------|------|

### Basal ganglia

|                                  |     |       |
|----------------------------------|-----|-------|
| Accumbens nucleus, shell         | +++ | AcbSh |
| Accumbens nucleus, lateral shell | +   | LAcSh |

### Thalamus

|                              |     |      |
|------------------------------|-----|------|
| Mediodorsal thalamus         | +++ | MD   |
| Paraventricular Thalamus     | +++ | PVT  |
| Lateral habenula             | ++  | LHb  |
| Mediodorsal thalamic nucleus | ++  | MD   |
| Reuniens thalamic nucleus    | ++  | Re   |
| Parasubthalamic nucleus      | +++ | PSTh |
| Trapezoid body               | +   | tz   |
| Precommissural nucleus       | ++  | PrC  |

### Anterior Hypothalamus

|                            |     |     |
|----------------------------|-----|-----|
| Anterior hypothalamic area | +++ | AHA |
| Medial preoptic area       | +++ | MPA |
| Lateral preoptic           | +++ | LPO |
| Medial preoptic nucleus    | +++ | MPO |
| Supraoptic nucleus         | +   | SO  |
| Suprachiasmatic Nucleus    | +   | SCN |
| Substantia innominata      | +++ | SIB |
| Ventral Pallidum           | +++ | VP  |

### Posterior Hypothalamus

|                                        |       |     |
|----------------------------------------|-------|-----|
| Peduncular part of lateral hypothalamu | +++   | PLH |
| Posterior Hypothalamus                 | +++   | PH  |
| Arcuate nucleus                        | +++   | Arc |
| Ventral tuberomamillary                | +++   | VTM |
| Dorsomedial hypothalamic nucleus       | ++    | DM  |
| Premammillary nucleus, dorsal          | ++    | PMD |
| Premammillary nucleus, ventral part    | +++++ | PMV |
| Ventromedial hypothalamic nucleus      | +++   | VMH |
| Retromammillary nucleus, medial part   | ++    | RMM |
| Retromammillary nucleus, lateral       | ++    | RML |

### Midbrain

|                                  |     |        |
|----------------------------------|-----|--------|
| Substantia nigra, reticular part | +++ | SNR    |
| Substantia nigra, compacta       | ++  | SNC    |
| Ventral tegmentum area           | +   | VTA    |
| Paranigral nucleus of the VTA    | ++  | VTA pn |

| <b>Brainstem</b>                         |    |       |
|------------------------------------------|----|-------|
| Medial parabrachial nucleus              | ++ | MPB   |
| Lateral parabrachial nucleus             | ++ | LPB   |
| Motor trigeminal nucleus (5N)            | +  | 5N    |
| Lateral paragigantocellular nucleus, ext | +  | LPGi  |
| Parabrachial pigmented area              | +  | PBP   |
| Perilemniscal nucleus, ventral           | +  | PLV   |
| Lateral lemniscus                        | +  | ll    |
| Ventral nucleus lateral lemniscus        | +  | VLL   |
| Medioventral periolivary nucleus         | +  | MVPO  |
| Medial superior olive                    | +  | MSO   |
| Lateral superior olive                   | +  | LSO   |
| Nucleus of the solitary tract            | ++ | NTS   |
| <b>Central Gray Nucleus</b>              |    |       |
| Periaquiductal gray (PAG)                | ++ | PAG   |
| Lateral PAG                              | ++ | IPAG  |
| Ventral lateral PAG                      | ++ | vIPAG |
| Lateral PAG                              | +  | LPAG  |
| Dorsolateral PAG                         | +  | DLPAG |
| Barrington's nucleus                     | +  | Bar   |
| Subcoeruleus nucleus, ventral            | +  | subCV |
| Locus coeruleus                          | ++ | LC    |
| Subbrachial nucleus                      | ++ | SubB  |
| <b>Raphe Nucleus</b>                     |    |       |
| Dorsal raphe nucleus, dorsal             | +  | DRD   |
| Raphe magnus nucleus                     | +  | RMg   |
| Rostral linear nucleus                   | +  | RLi   |
| Trapezoid body                           | +  | Tz    |
| <b>Reticular formation</b>               |    |       |
| Pontine reticular nucleus (ventral)      | +  | PnC   |
| Pontine tegmentum                        | +  | Ptg   |
| A5 noradrenaline cells                   | +  | A5    |
